# Supplementary material for: The BTB-domain transcription factor ZBTB2 recruits chromatin remodelers and a histone chaperone during the exit from pluripotency
Source: PubMed Central journal article supplement — J Biol Chem. 2021 Jul 13;297(2):100947. doi: 10.1016/j.jbc.2021.100947 (PMC8350017; doi:10.1016/j.jbc.2021.100947), 2021-07-13
Supplement: mmc1.pdf [file mmc1.pdf]

## **The BTB-domain transcription factor ZBTB2 recruits chromatin remodelers and a histone chaperone during the exit from pluripotency**

Daniel Olivieri, Sujani Paramanathan, Anais F. Bardet, Daniel Hess, Sébastien A. Smallwood, Ulrich Elling, Joerg Betschinger

### **SUPPLEMENTARY INFORMATION**

Supplementary Figures S1-S5

Supplementary Table S1: Screen results

Supplementary Table S2: CRISPR KO, KI, and genotyping strategies; cell lines

Supplementary Table S3: Gene expression tables with clusters and post- and pre-implantation epiblast genes

Supplementary Table S4: AP-MS bait sequences and Y2H constructs

Supplementary Table S5: AP-MS results tables

Supplementary Table S6: BTB domain sequences

Figure S1

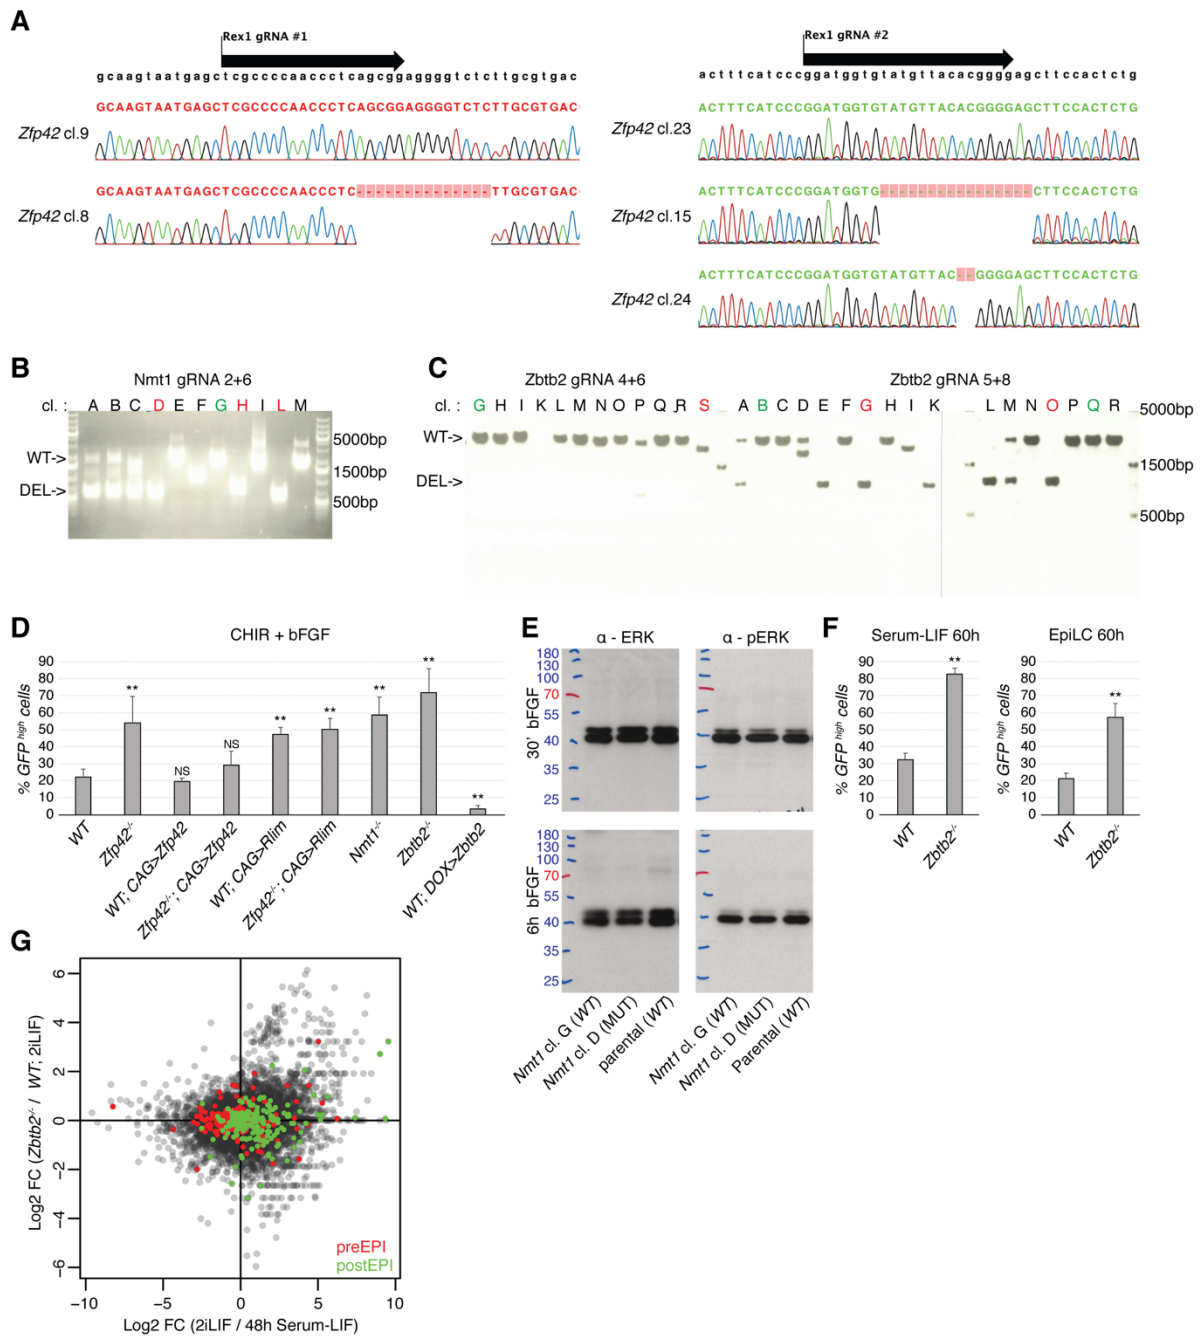

Supplementary Figure S1: Related to Figure 1.

(A) Chromatograms of *Zfp42*<sup>-/-</sup> (cl.8, 15, 24) and WT (cl.9, 23) sibling clones under the respective gRNAs used (see also Table S2).

(B,C) Genotyping PCR of *Nmt1* and *Zbtb2* targeted clones, showing knockout (red) and sibling control clones (green) used in this study (see also Table S2).

(D,F) Average and standard deviation (SD) of *Nanog*>*GFP*-high cells of biological triplicates quantified as in Fig.1B, C, D (D). and Fig.1F (F). \*\* indicates p-values<0.001 and NS p-values>0.1 compared to corresponding WT controls.

(E) Anti-ERK and anti-phospho-ERK western-blot of lysates from *Nmt1*<sup>-/-</sup> and WT clones.

(G) Scatterplot of log2FCs in gene expression of indicated contrasts. Green labels post-implantation (postEPI) and red pre-implantation epiblast (preEPI) specific genes (55).

Figure S2

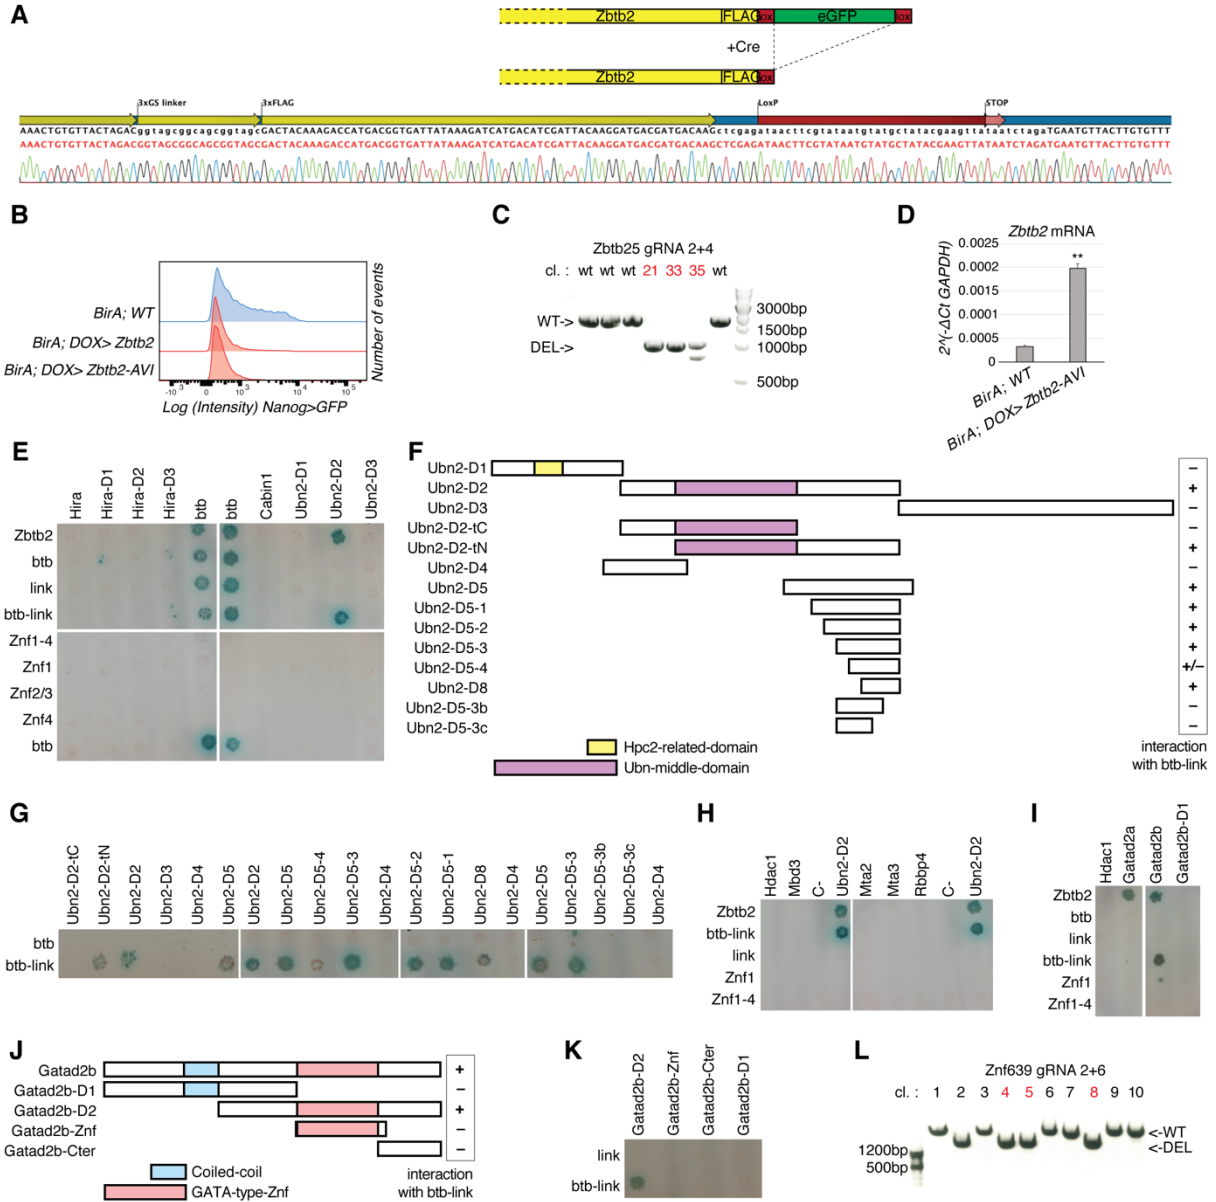

**Supplementary Figure S2: Identification of the ZBTB2-interacting subunits and domains. Related to Figure 2.**

**(A)** Scheme of the ZBTB2-3xFLAG knock-in strategy (see also Table S2) and chromatogram of final homozygous cell line.

**(B)** *Nanog>GFP* intensities after switching from 2iLIF to N2B27 +CHIR +bFGF for 3 days in the presence of DOX of indicated genotypes.

**(C)** *Zbtb25* genotyping PCR of *Zbtb2*<sup>-/-</sup>; *Zbtb25*<sup>-/-</sup> clones; red labels clones used in this study.

**(D)** qPCR of *Zbtb2* relative to *GAPDH* in WT and ZBTB2-AVI overexpressing cells. Average and SD of technical triplicates, \*\* indicates p-value<0.001.

**(E,G,H,I,K)** Colony growth on QDOXA plates of strains expressing indicated proteins. Bait constructs are vertical and prey constructs are horizontal.

**(F,J)** Diagram of *Ubn2* (**F**) and *Gatad2b* (**J**) constructs used for Y2H analysis; + and – indicates positive and negative interactions as in (**G,I** and **K**).

**(L)** Genotyping PCR of *Znf639*<sup>-/-</sup> clones; red labels clones used in this study.

Figure S3

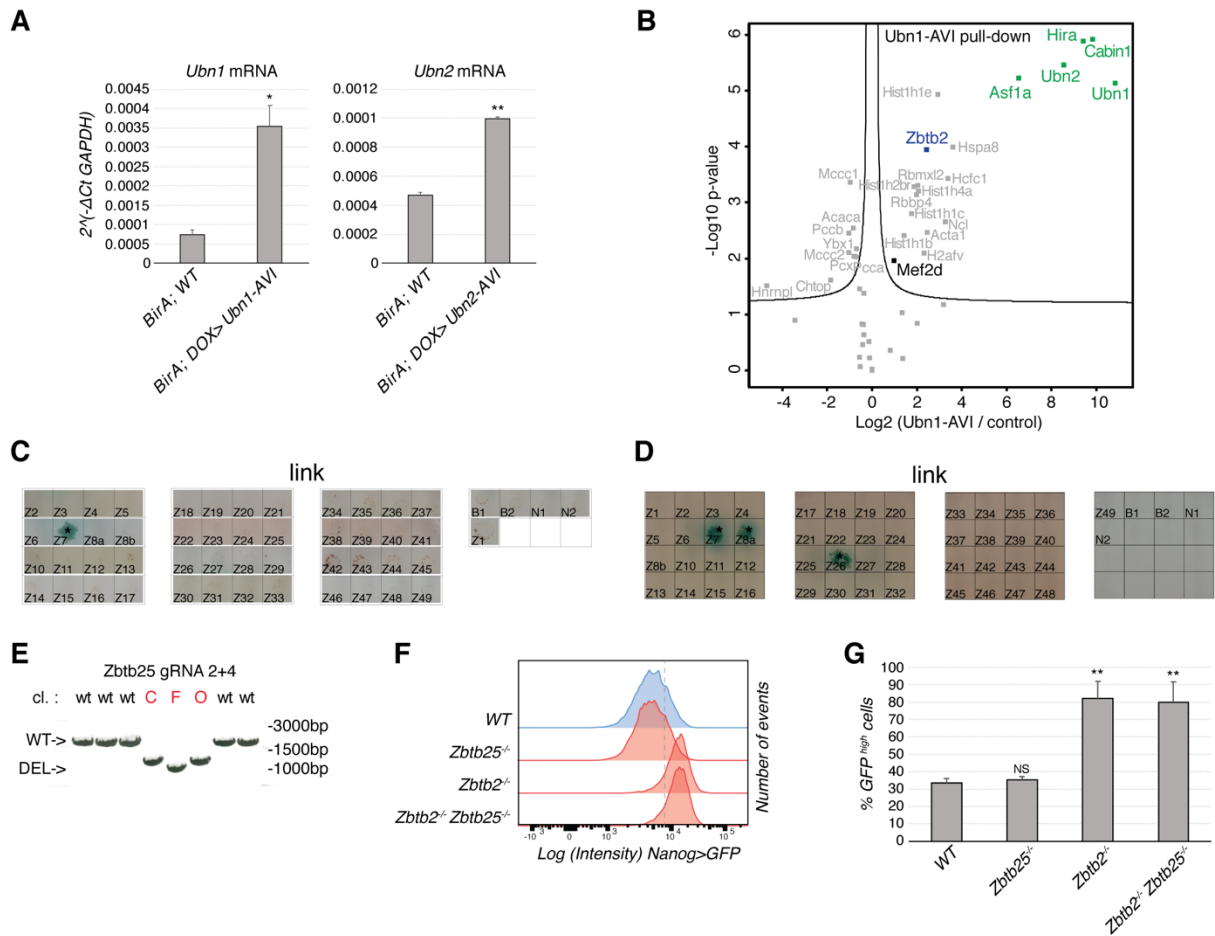

**Supplementary Figure S3: Lack of genetic interaction between ZBTB2 and ZBTB25. Related to Figure 3.**

**(A)** qPCR of *Ubn1* and *Ubn2* relative to *GAPDH* in WT and UBN1-AVI- or UBN2-AVI-overexpressing cells. Average and SD of technical triplicates, \* indicates p-value<0.01 and \*\* p-value<0.001.

**(B)** Volcano plot of protein enrichments in AP-MS of mESCs overexpressing UBN1-AVI compared to control BirA-only-expressing mESCs. ZBTB2 is indicated in blue and HIRA subunits in green.

**(C,D)** Colony growth on QDOXA plates of control matings for experiments presented in Fig.3B,C,F **(C)** and in Fig.3D **(D)** using ZBTB2's link region as control bait construct.

**(E)** *Zbtb25* genotyping PCR of *Zbtb25*<sup>-/-</sup> clones; red labels clones used in this study.

**(F,G)** *Nanog*>*GFP* intensities after switching from 2iLIF to Serum-LIF after 60h of indicated genotypes **(F)**. Dashed line indicates the threshold for quantification of GFP-high cells as in **(G)**. **(G)** average and SD of biological triplicates; \*\* indicates p-values<0.001 and NS p-values>0.1 compared to the WT control.

Figure S4

**A**

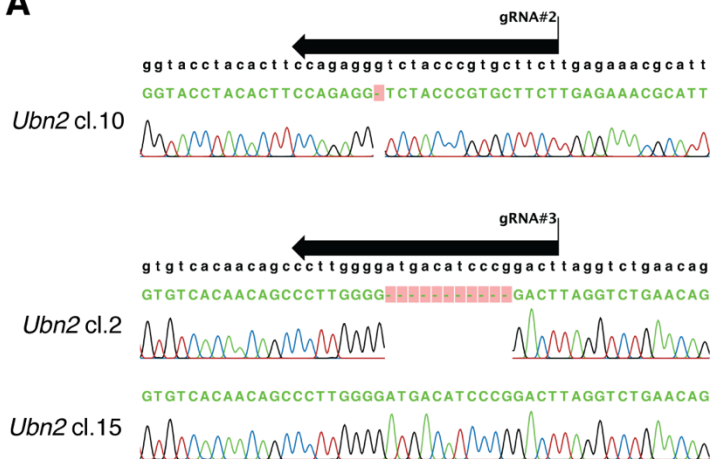

**B**

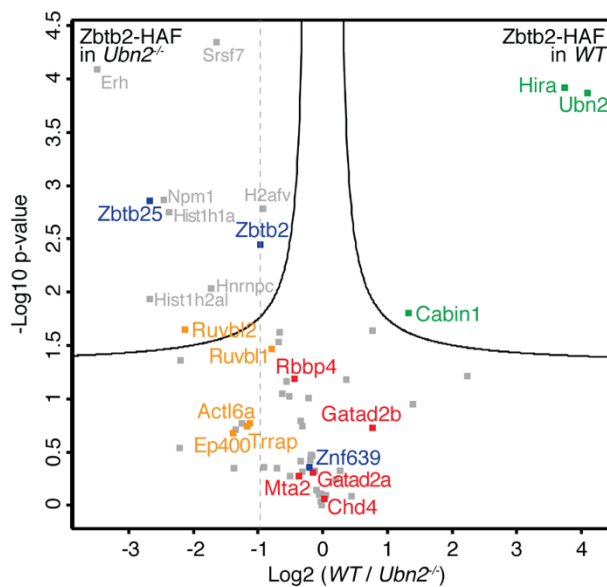

**Supplementary Figure S4: The Ep400 interaction is not mediated by the HiRA complex. Related to Figure 4.**

**(A)** Chromatograms of *Ubn2*<sup>-/-</sup> (cl.10,2) and WT (cl.15) sibling clones under the respective gRNAs used (see also Table S2).

**(B)** Volcano plot of protein enrichments in AP-MS of overexpressed ZBTB2-HAF in WT compared to *Ubn2*<sup>-/-</sup> mESCs. ZBTB2 and partner TFs are indicated in blue. The dashed line marks enrichment of the ZBTB2-HAF bait protein which is similar to that of NuRD subunits in red and Ep400 subunits in orange, while interaction with HiRA subunits in green is comparatively reduced in *Ubn2*<sup>-/-</sup> mESCs.

Figure S5

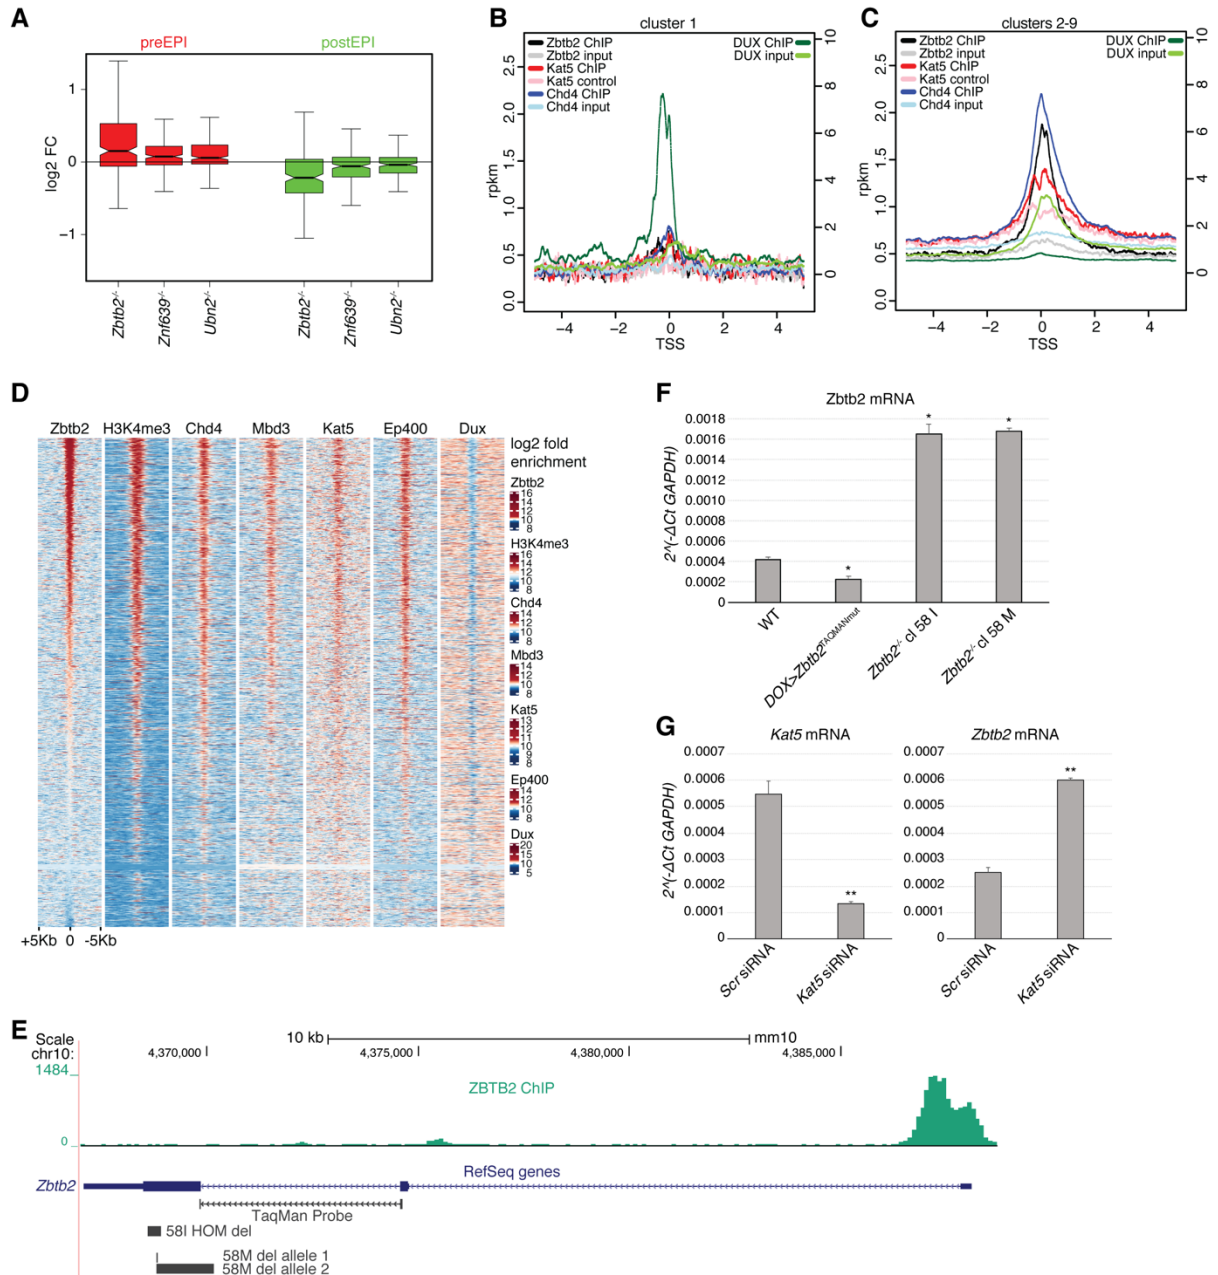

**Supplementary Figure S5: ZBTB2 binds and represses its own promoter. Related to Figure 5.**

**(A)** Boxplot of log<sub>2</sub> fold differential expression after 48h in Serum-LIF of pre-implantation (preEPI, red) and post-implantation (postEPI, green) epiblast specific genes (55) in indicated genotypes compared to *WT* cells.

**(B,C)** ZBTB2 (53), KAT5 (60) and CHD4 (25) (left scale), and DUX (17) (right scale) ChIP-seq rpkm centered on TSSs of cluster 1 **(B)** and cluster 2-9 genes **(C)**, according to Fig. 5D.

**(D)** Heatmap of ZBTB2 (53), H3K4me3 (79), CHD4, MBD3 (25), KAT5, EP400 (60) and DUX (17) log<sub>2</sub> fold ChIP-seq enrichment over respective controls at accessible (ATACseq, not shown) TSSs.

**(E)** Diagram of the *Zbtb2* locus, showing the ZBTB2 peak at the TSS, and the deletions in the *Zbtb2*<sup>-/-</sup> clones 58I and 58M that give rise to transcripts that are detectable by the qPCR probe (TaqMan Probe) against endogenous *Zbtb2*.

**(F)** qPCR of endogenous *Zbtb2* relative to *GAPDH* in *WT* cells, *WT* cells over-expressing a *Zbtb2* construct that cannot be detected by the qPCR probe (TAQMANmut) and the *Zbtb2*<sup>-/-</sup> clones depicted in Fig. S5E. Average and SD of technical triplicates; \* indicates p-values<0.01 compared to *WT*.

**(G)** qPCR of *Kat5* and *Zbtb2* relative to *GAPDH* upon *Kat5* or control siRNA transfection. Average and SD of technical triplicates; \*\* indicates p-value<0.001 compared to control siRNA.
